# Supplementary material
Source: Springer Nature journal article supplement (https://www.springermedizin.de/resource/supplementary/12889_2006_1021_MOESM3_ESM.pdf/9503152)

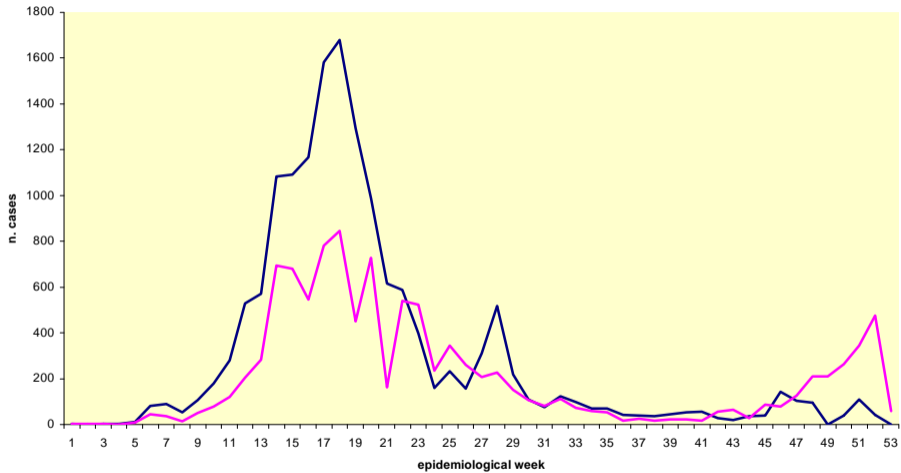

casos notificados    casos georreferenciados

Supplement: MOESM3 [file 9503152]
